# Supplementary material
Source: PubMed Central journal article supplement (PMC3128927)

Supplemental figure 4

CD101 expression on CD11c<sup>hi</sup> spleen cells.

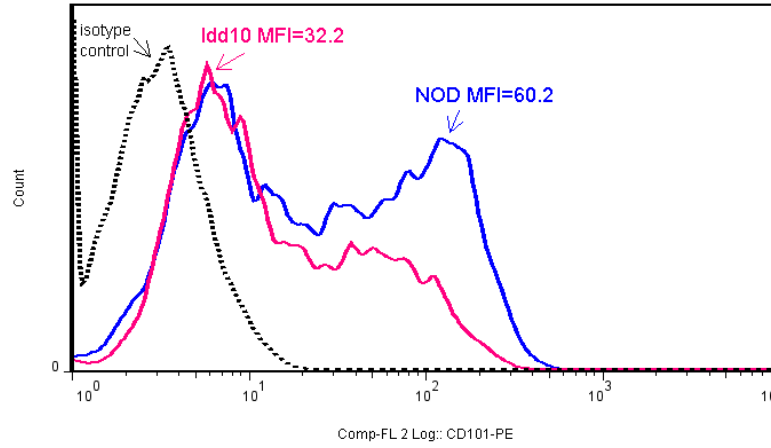

Expression of CD101, CD11b, CD4, CD8 and B220 on CD11c<sup>hi</sup> spleen cells.

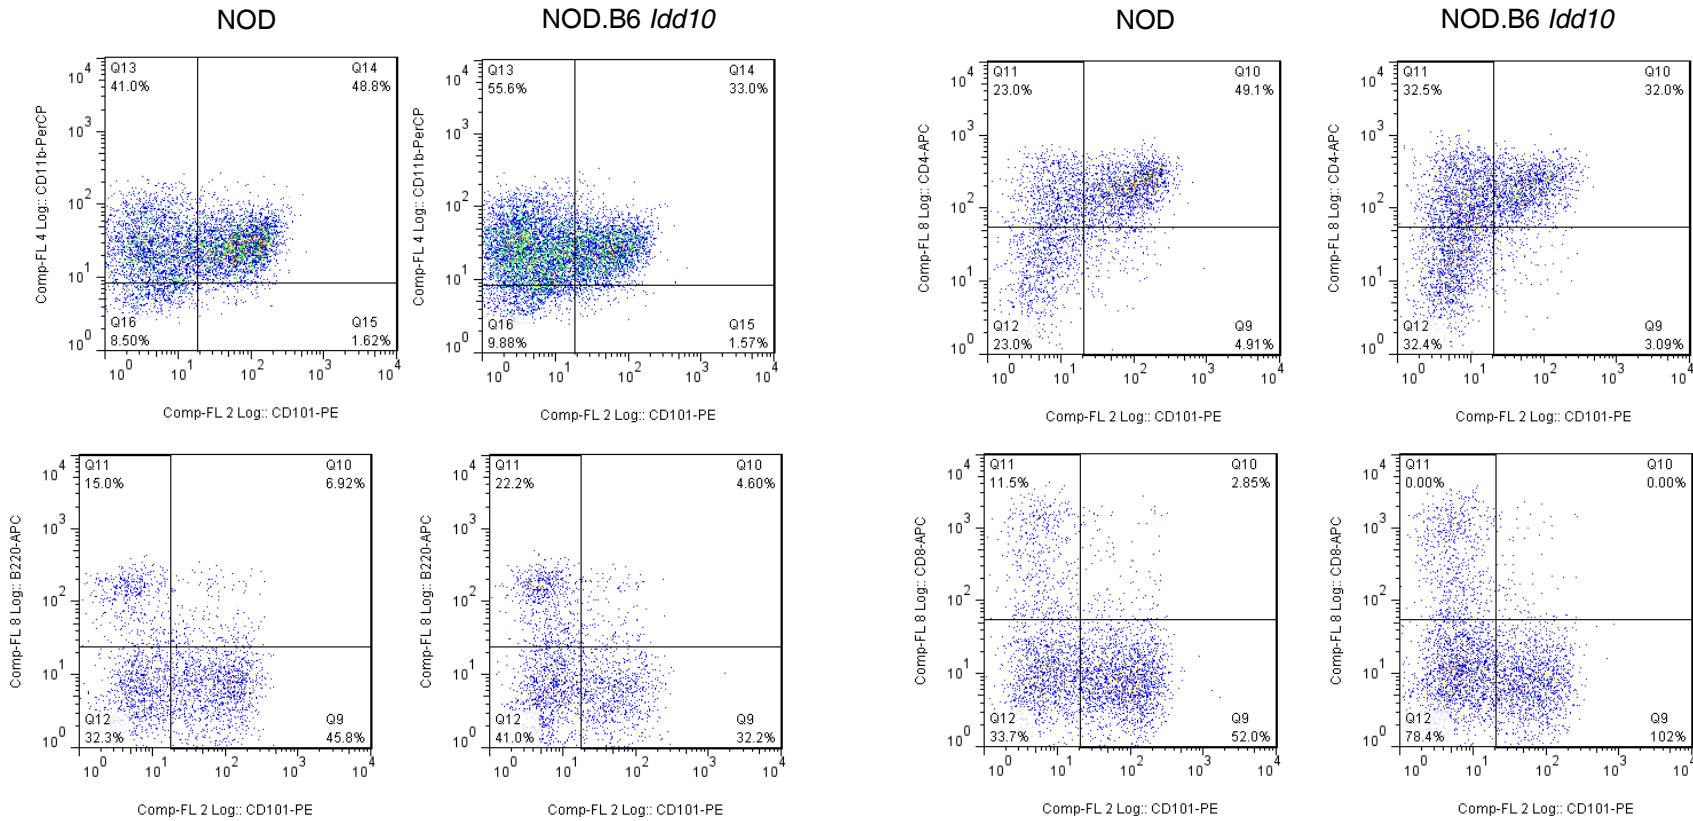

Supplement: NIHMS293528-supplement-5.pdf [file NIHMS293528-supplement-5.pdf]
