# Supplementary material
Source: PubMed Central journal article supplement (PMC3128927)
Supplement: NIHMS293528-supplement-6.pdf [file NIHMS293528-supplement-6.pdf]

| <b>Marker</b>          | <b>Forward primer</b>                       | <b>Reverse primer</b>                     | <b>Genotyping method</b>                                                                                                    |
|------------------------|---------------------------------------------|-------------------------------------------|-----------------------------------------------------------------------------------------------------------------------------|
| BM70A7SSR.18           | CCTCCCTCCTTCTCTCTTCC                        | GGACTTGCCATGTGGATCTT                      | B6 allele > NOD, 3bp                                                                                                        |
| rs3158127              | TTAGTGGGACAGCGATCTGA                        | GCAGGCTGTTGCTACTTTCA                      | Requires that the amplified product be digested with restriction endonuclease Ssp1 from New England Biolabs (UK) Cat# R0132 |
| Ptgfrn_Int-1_SNP2      | GGGACGCTCGTCTATCCTTT                        | GGCTCACTTTTCCTTGAAGC                      | The genotype of Ptgfrn_int-1_snp2 is determined by sequencing the amplified product                                         |
| AL672281_7             | GAACCAAGGCAGGCATTA                          | TTACTGCCCCCTTCTCCTTT                      | NOD allele > B6, 2bp                                                                                                        |
| AL645930.10.6          | AAAAACCCAGGACCAGACAA                        | AGGAAAGGCCTAATGTCAACC                     | B6 allele > NOD, 2bp                                                                                                        |
| AL645930.10.10         | GGAAGGATCCAGTGCCTAT                         | GAACCTTGCATTCCCTCAAGC                     | Agarose resolvable B6 allele > NOD                                                                                          |
| 2410_micro-1           | AGGAGAATCTTCTCAGAGCCTTA                     | TGAATCTTTATAGACATGTGATGGA                 | Agarose resolvable B6 allele > NOD                                                                                          |
| 2410_P_SNP-5           | AGCAAGATCTTTAGCTGTTGTTAAT                   | AGTTTGCTGTCTTGGGACAT                      | Requires that the amplified product be digested with restriction endonuclease Ava1 from New England Biolabs (UK) Cat# R0152 |
| 163Gothic_2<br>CD101KO | CAGCCACCTTTGCTTTCTG<br>TCAGTGGGCTGAAAACCACA | GTCACATCCACAAGGCACAC<br>CAAATGCACAGTGCCCA | 163Gothic_2 and CD101KO are used to detect the wild type and targeted Cd101 alleles, respectively                           |

**Supplemental Table 1: Novel genotyping primers used in this study**
