# Supplementary material
Source: PubMed Central journal article supplement (PMC3128927)

# Supplemental figure 1

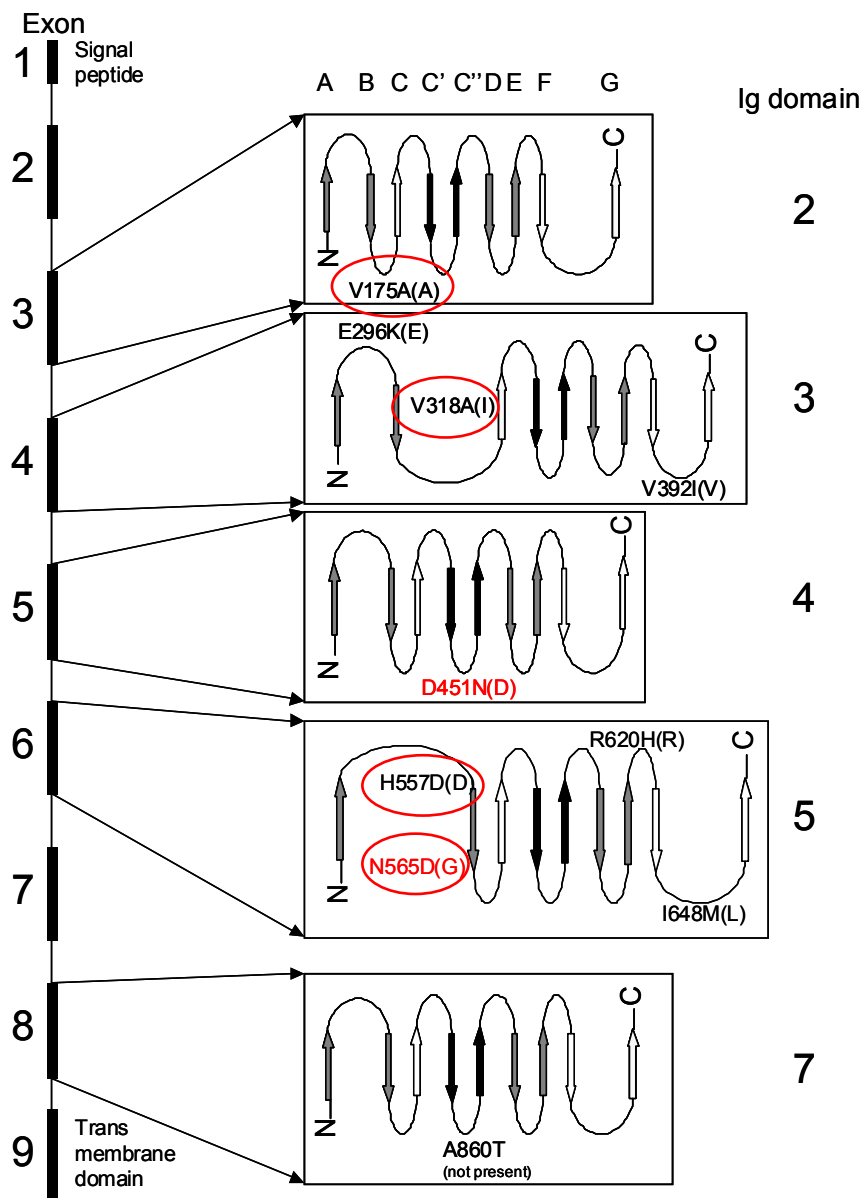

Supplement: NIHMS293528-supplement-2.pdf [file NIHMS293528-supplement-2.pdf]

# Supplemental figure 2

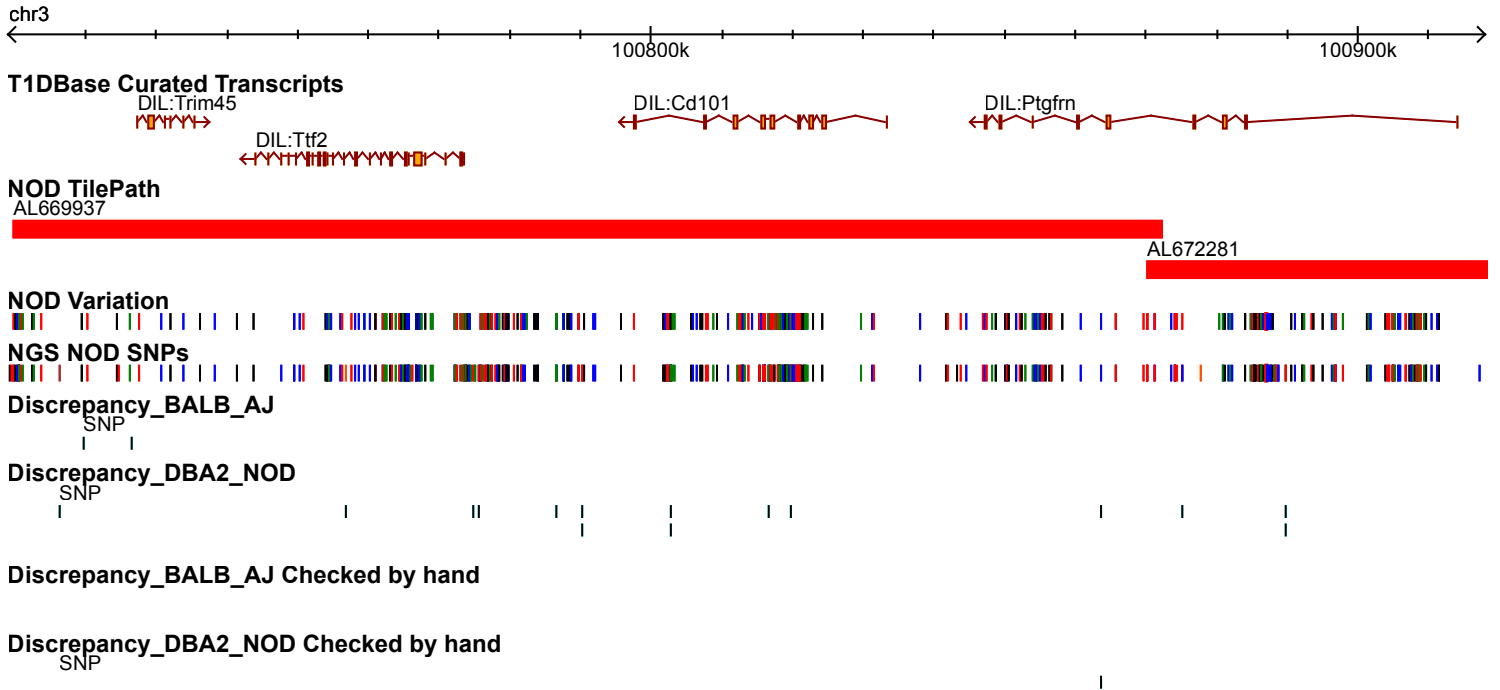

Supplement: NIHMS293528-supplement-3.pdf [file NIHMS293528-supplement-3.pdf]

### Supplemental figure 3

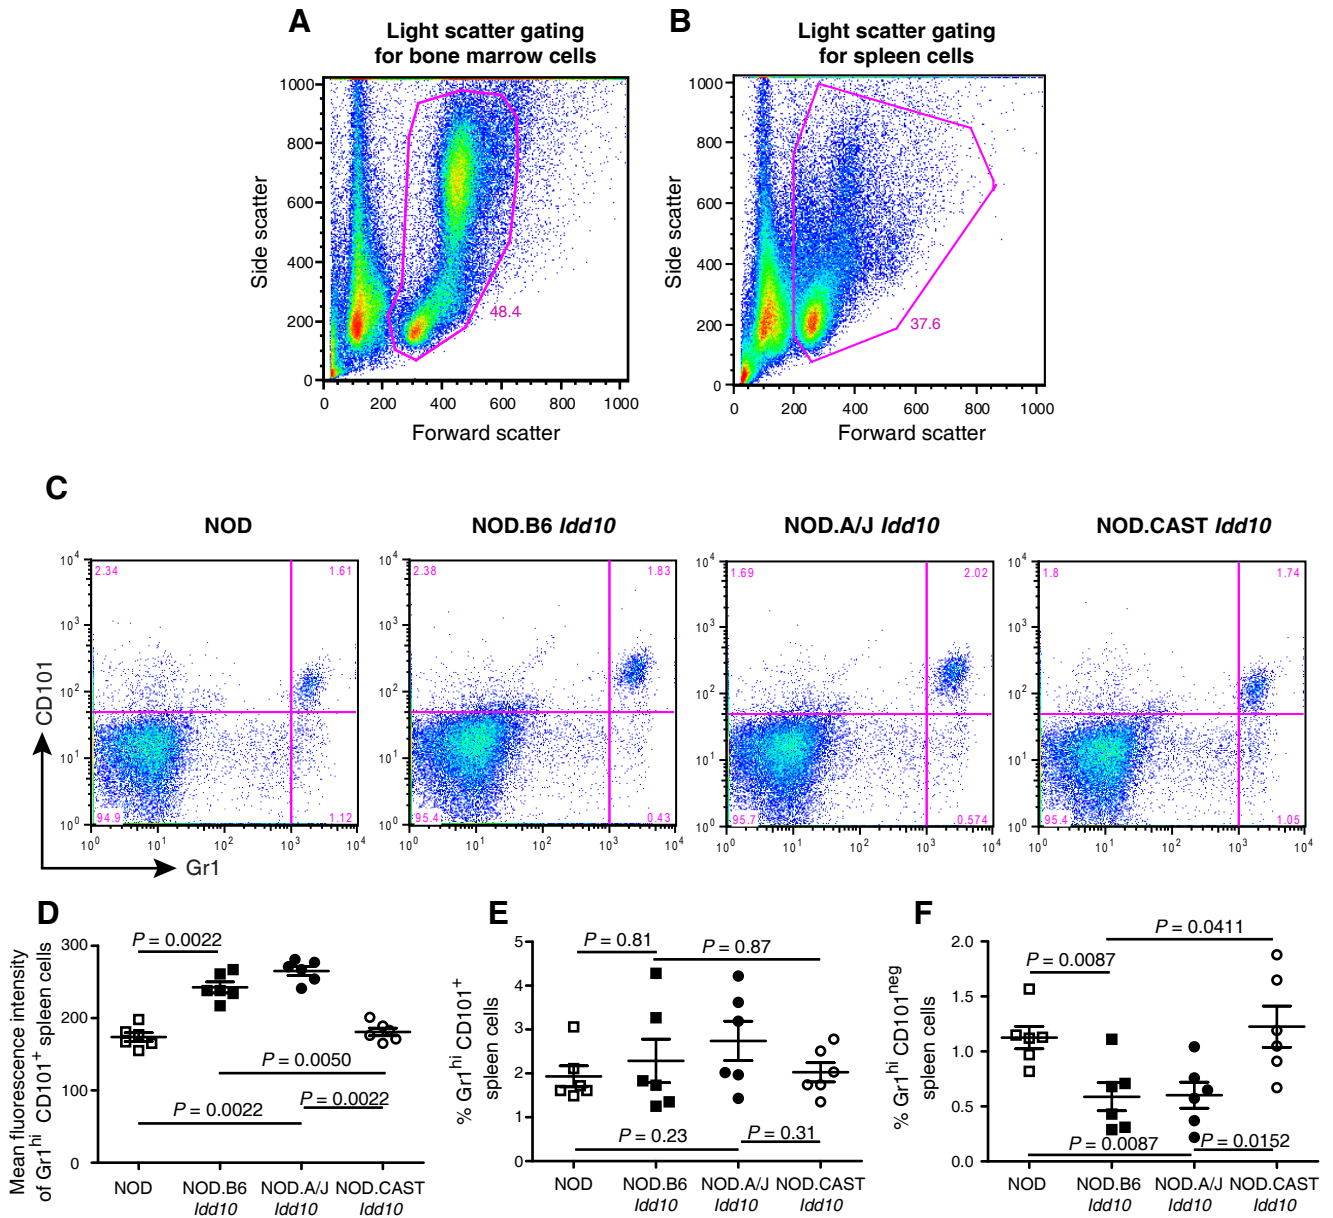

Supplement: NIHMS293528-supplement-4.pdf [file NIHMS293528-supplement-4.pdf]
